# Supplementary material for: Polycatenar unsymmetrical β-diketonate ligands as a useful tool to induce columnar mesomorphism on highly luminescent boron difluoride complexes
Source: Royal Society of Chemistry journal article supplement (doi:10.1039/c4tc01373e), 2014-09-22
Supplement: c4tc01373e1.pdf [file c4tc01373e1.pdf]

## Supporting Information

### Polycatenar unsymmetrical $\beta$ -diketonate ligands as a useful tool to induce columnar mesomorphism on highly luminescent boron difluoride complexes

Ignacio Sánchez,<sup>a</sup> Cristina Nuñez,<sup>b,c</sup> José Antonio Campo,<sup>a</sup> M. Rosario Torres,<sup>d</sup> Mercedes Cano<sup>\*a</sup> and Carlos Lodeiro<sup>\*b,e</sup>

<sup>a</sup> Department of Inorganic Chemistry I, Faculty of Chemistry, Universidad Complutense de Madrid, 28040 Madrid, Spain. Fax: 34 91 3944352; Tel: 34 91 3944340; E-mail: mmcano@ucm.es

<sup>b</sup> BIOSCOPE Group, REQUIMTE, Chemistry Department, Faculty of Science and Technology, University NOVA of Lisbon, Caparica 2829-516, Portugal

<sup>c</sup> Ecology Research Group, Department of Geographical and Life Sciences, Canterbury Christ Church University, CT1 1QU, Canterbury, United Kingdom

<sup>d</sup> X-Ray Diffraction Laboratory, Faculty of Chemistry, Universidad Complutense de Madrid, 28040 Madrid, Spain

<sup>e</sup> ProteoMass Scientific Society. Madan Parque. Rua dos Inventores. 2825-182. Caparica. Portugal

### Characterisation of the compounds

#### Boron derivatives

#### Boron difluoride $\beta$ -diketonate complexes of the type $[\text{BF}_2]_{1,2}(n/m)$ ; $n = m = 12, 14, 16, 18$ (1-4); $n = 12, m = 14, 16, 18$ (5-7)

$[\text{BF}_2]_{1,2}(12/12)$  (1): yellow solid (68%). Mp 60 °C. Elemental analysis: Found: C, 74.6; H, 9.8%.  $\text{C}_{51}\text{H}_{83}\text{BF}_2\text{O}_5$  requires C, 74.3; H, 10.1%.  $\nu_{\text{max}}(\text{solid})/\text{cm}^{-1}$ : 2922vs, 2851vs  $\nu(\text{C-H})$ , 1607s  $\nu(\text{C=C})$ , 1550vs  $\nu(\text{C=O})$ , 1387m  $\nu(\text{B-O})$ , 1039s  $\nu(\text{B-F})$ .  $\delta_{\text{H}}$  (300 MHz;  $\text{CDCl}_3$ ;  $\text{Me}_4\text{Si}$ )/ppm: 0.88 (9 H, t,  $^3J$  6.6,  $\text{CH}_3$ ), 1.26-1.48 (54 H, m,  $\text{CH}_2$ ), 1.80 (6 H, q,  $\text{CH}_2$ ), 4.01 (4 H, t,  $^3J$  6.5,  $\text{OCH}_2$ ), 4.07 (2 H, t,  $^3J$  6.5,  $\text{OCH}_2$ ), 6.71 (1 H, t,  $^4J$  2.1,  $\text{H}4''$ ), 7.00 (2 H, AA'XX' system,  $N$  9.0,  $\text{H}3'$  and  $\text{H}5'$ ), 7.03 (1 H, s,  $\text{H}2$ ), 7.19 (2 H, d,  $^4J$  2.1,  $\text{H}2''$  and  $\text{H}6''$ ), 8.12 (2 H, AA'XX' system,  $N$  9.0,  $\text{H}2'$  and  $\text{H}6'$ ).

$[\text{BF}_2]_{1,2}(14/14)$  (2): yellow solid (62%). Mp 72 °C. Elemental analysis: Found: C, 74.8; H, 10.0%.  $\text{C}_{57}\text{H}_{95}\text{BF}_2\text{O}_5$  requires C, 75.3; H, 10.5%.  $\nu_{\text{max}}(\text{solid})/\text{cm}^{-1}$ : 2922vs, 2849vs  $\nu(\text{C-H})$ , 1606s  $\nu(\text{C=C})$ , 1548vs  $\nu(\text{C=O})$ , 1390m  $\nu(\text{B-O})$ , 1036s  $\nu(\text{B-F})$ .  $\delta_{\text{H}}$  (300 MHz;  $\text{CDCl}_3$ ;  $\text{Me}_4\text{Si}$ )/ppm: 0.88 (9 H, t,  $^3J$  6.7,  $\text{CH}_3$ ), 1.26-1.48 (66 H, m,  $\text{CH}_2$ ), 1.80 (6 H, m,  $\text{CH}_2$ ), 4.00 (4 H, t,  $^3J$  6.5,  $\text{OCH}_2$ ), 4.06 (2 H, t,  $^3J$  6.5,  $\text{OCH}_2$ ), 6.70 (1 H, t,  $^4J$  2.1,  $\text{H}4''$ ), 6.98 (2 H, AA'XX' system,  $N$  9.0,  $\text{H}3'$  and  $\text{H}5'$ ), 7.02 (1 H, s,  $\text{H}2$ ), 7.17 (2 H, d,  $^4J$  2.1,  $\text{H}2''$  and  $\text{H}6''$ ), 8.10 (2 H, AA'XX' system,  $N$  9.0,  $\text{H}2'$  and  $\text{H}6'$ ).

**[BF<sub>2</sub>]<sub>1,2</sub>(16/16) (3):** yellow solid (70%). Mp 80 °C. Elemental analysis: Found: C, 76.6; H, 10.5%. C<sub>63</sub>H<sub>107</sub>BF<sub>2</sub>O<sub>5</sub> requires C, 76.2; H, 10.8%.  $\nu_{\max}(\text{solid})/\text{cm}^{-1}$ : 2922vs, 2849vs  $\nu(\text{C-H})$ , 1607s  $\nu(\text{C=C})$ , 1549vs  $\nu(\text{C=O})$ , 1387m  $\nu(\text{B-O})$ , 1038s  $\nu(\text{B-F})$ .  $\delta_{\text{H}}$  (300 MHz; CDCl<sub>3</sub>; Me<sub>4</sub>Si)/ppm: 0.88 (9 H, t, <sup>3</sup>J 6.6, CH<sub>3</sub>), 1.26-1.48 (78 H, m, CH<sub>2</sub>), 1.80 (6 H, m, CH<sub>2</sub>), 4.01 (4 H, t, <sup>3</sup>J 6.6, OCH<sub>2</sub>), 4.08 (2 H, t, <sup>3</sup>J 6.6, OCH<sub>2</sub>), 6.72 (1 H, t, <sup>4</sup>J 2.1, H4''), 7.00 (2 H, AA'XX' system, *N* 9.0, H3' and H5'), 7.03 (1 H, s, H2), 7.20 (2 H, d, <sup>4</sup>J 2.1, H2'' and H6''), 8.13 (2 H, AA'XX' system, *N* 9.0, H2' and H6').

**[BF<sub>2</sub>]<sub>1,2</sub>(18/18) (4):** yellow solid (67%). Mp 80 °C. Elemental analysis: Found: C, 75.9; H, 10.5%. C<sub>69</sub>H<sub>119</sub>BF<sub>2</sub>O<sub>5</sub>(CH<sub>2</sub>Cl<sub>2</sub>)<sub>0.25</sub> requires C, 75.7; H, 10.9%.  $\nu_{\max}(\text{solid})/\text{cm}^{-1}$ : 2920vs, 2850vs  $\nu(\text{C-H})$ , 1608s  $\nu(\text{C=C})$ , 1551vs  $\nu(\text{C=O})$ , 1382m  $\nu(\text{B-O})$ , 1037s  $\nu(\text{B-F})$ .  $\delta_{\text{H}}$  (300 MHz; CDCl<sub>3</sub>; Me<sub>4</sub>Si)/ppm: 0.88 (9 H, t, <sup>3</sup>J 6.7, CH<sub>3</sub>), 1.26-1.48 (90 H, m, CH<sub>2</sub>), 1.80 (6 H, m, CH<sub>2</sub>), 4.00 (4 H, t, <sup>3</sup>J 6.5, OCH<sub>2</sub>), 4.07 (2 H, t, <sup>3</sup>J 6.6, OCH<sub>2</sub>), 6.71 (1 H, t, <sup>4</sup>J 2.1, H4''), 7.00 (2 H, AA'XX' system, *N* 9.0, H3' and H5'), 7.03 (1 H, s, H2), 7.19 (2 H, d, <sup>4</sup>J 2.1, H2'' and H6''), 8.13 (2 H, AA'XX' system, *N* 9.0, H2' and H6').

**[BF<sub>2</sub>]<sub>1,2</sub>(12/14) (5):** yellow viscous solid (68%). Mp 64 °C. Elemental analysis: Found: C, 72.7; H, 9.7%. C<sub>55</sub>H<sub>91</sub>BF<sub>2</sub>O<sub>5</sub>(CH<sub>2</sub>Cl<sub>2</sub>)<sub>0.5</sub> requires C, 72.2; H, 10.0%.  $\nu_{\max}(\text{solid})/\text{cm}^{-1}$ : 2918vs, 2850vs  $\nu(\text{C-H})$ , 1607s  $\nu(\text{C=C})$ , 1563vs  $\nu(\text{C=O})$ , 1377m  $\nu(\text{B-O})$ , 1050s  $\nu(\text{B-F})$ .  $\delta_{\text{H}}$  (300 MHz; CDCl<sub>3</sub>; Me<sub>4</sub>Si)/ppm: 0.88 (9 H, t, <sup>3</sup>J 6.6, CH<sub>3</sub>), 1.26-1.48 (62 H, m, CH<sub>2</sub>), 1.80 (6 H, m, CH<sub>2</sub>), 4.01 (4 H, t, <sup>3</sup>J 6.5, OCH<sub>2</sub>), 4.08 (2 H, t, <sup>3</sup>J 6.5, OCH<sub>2</sub>), 6.72 (1 H, t, <sup>4</sup>J 2.1, H4''), 7.00 (2 H, AA'XX' system, *N* 9.0, H3' and H5'), 7.03 (1 H, s, H2), 7.20 (2 H, d, <sup>4</sup>J 2.1, H2'' and H6''), 8.13 (2 H, AA'XX' system, *N* 9.0, H2' and H6').

**[BF<sub>2</sub>]<sub>1,2</sub>(12/16) (6):** yellow solid (65%). Mp 72 °C. Elemental analysis: Found: C, 75.4; H, 10.2%. C<sub>59</sub>H<sub>99</sub>BF<sub>2</sub>O<sub>5</sub> requires C, 75.6; H, 10.6%.  $\nu_{\max}(\text{solid})/\text{cm}^{-1}$ : 2919vs, 2849vs  $\nu(\text{C-H})$ , 1607s  $\nu(\text{C=C})$ , 1543vs  $\nu(\text{C=O})$ , 1389m  $\nu(\text{B-O})$ , 1026s  $\nu(\text{B-F})$ .  $\delta_{\text{H}}$  (300 MHz; CDCl<sub>3</sub>; Me<sub>4</sub>Si)/ppm: 0.88 (9 H, t, <sup>3</sup>J 6.6, CH<sub>3</sub>), 1.26-1.48 (70 H, m, CH<sub>2</sub>), 1.80 (6 H, m, CH<sub>2</sub>), 4.01 (4 H, t, <sup>3</sup>J 6.5, OCH<sub>2</sub>), 4.07 (2 H, t, <sup>3</sup>J 6.5, OCH<sub>2</sub>), 6.72 (1 H, t, <sup>4</sup>J 2.1, H4''), 7.00 (2 H, AA'XX' system, *N* 9.0, H3' and H5'), 7.03 (1 H, s, H2), 7.20 (2 H, d, <sup>4</sup>J 2.1, H2'' and H6''), 8.13 (2 H, AA'XX' system, *N* 9.0, H2' and H6').

**[BF<sub>2</sub>]<sub>1,2</sub>(12/18) (7):** yellow viscous solid (53%). Mp 62 °C. Elemental analysis: Found: C, 76.6; H, 10.4%. C<sub>63</sub>H<sub>107</sub>BF<sub>2</sub>O<sub>5</sub> requires C, 76.2; H, 10.9%.  $\nu_{\max}(\text{solid})/\text{cm}^{-1}$ : 2919vs, 2849vs  $\nu(\text{C-H})$ , 1606s  $\nu(\text{C=C})$ , 1552vs  $\nu(\text{C=O})$ , 1389m  $\nu(\text{B-O})$ , 1022s  $\nu(\text{B-F})$ .  $\delta_{\text{H}}$  (300

MHz; CDCl<sub>3</sub>; Me<sub>4</sub>Si)/ppm: 0.88 (9 H, t, <sup>3</sup>J 6.6, CH<sub>3</sub>), 1.26-1.48 (78 H, m, CH<sub>2</sub>), 1.80 (6 H, m, CH<sub>2</sub>), 4.01 (4 H, t, <sup>3</sup>J 6.5, OCH<sub>2</sub>), 4.08 (2 H, t, <sup>3</sup>J 6.5, OCH<sub>2</sub>), 6.72 (1 H, t, <sup>4</sup>J 2.1, H4''), 7.00 (2 H, AA'XX' system, *N* 9.0, H3' and H5'), 7.03 (1 H, s, H2), 7.20 (2 H, d, <sup>4</sup>J 2.1, H2'' and H6''), 8.13 (2 H, AA'XX' system, *N* 9.0, H2' and H6').

**Boron difluoride β-diketonate complexes of the type [BF<sub>2</sub>]<sub>1,3</sub>(*n/m*); *n* = *m* = 12, 14, 16, 18 (8-11); *n* = 12, *m* = 14, 16, 18 (12-14)**

[BF<sub>2</sub>]<sub>1,3</sub>(12/12) (8): yellow solid (36%). Mp 50 °C. Elemental analysis: Found: C, 74.9; H, 10.2%. C<sub>63</sub>H<sub>107</sub>BF<sub>2</sub>O<sub>6</sub> requires C, 75.0; H, 10.7%. *v*<sub>max</sub>(solid)/cm<sup>-1</sup>: 2921vs, 2852vs *v*(C-H), 1606s *v*(C=C), 1564vs *v*(C=O), 1380m *v*(B-O), 1033s *v*(B-F). *δ*<sub>H</sub> (300 MHz; CDCl<sub>3</sub>; Me<sub>4</sub>Si)/ppm: 0.88 (12 H, t, <sup>3</sup>J 6.6, CH<sub>3</sub>), 1.27-1.48 (71 H, m, CH<sub>2</sub>), 1.71-1.89 (8 H, m, CH<sub>2</sub>), 4.04 (6 H, t, <sup>3</sup>J 6.4, OCH<sub>2</sub>), 4.09 (2 H, t, <sup>3</sup>J 6.5, OCH<sub>2</sub>), 6.94 (2 H, AA'XX' system, *N* 9.0, H3' and H5'), 6.96 (1 H, s, H2), 7.24 (2 H, s, H2'' and H6''), 8.04 (2 H, AA'XX' system, *N* 9.0, H2' and H6').

[BF<sub>2</sub>]<sub>1,3</sub>(14/14) (9): yellow solid (70%). Mp 62 °C. Elemental analysis: Found: C, 75.9; H, 10.6%. C<sub>71</sub>H<sub>123</sub>BF<sub>2</sub>O<sub>6</sub> requires C, 76.0; H, 11.0%. *v*<sub>max</sub>(solid)/cm<sup>-1</sup>: 2920vs, 2851vs *v*(C-H), 1607s *v*(C=C), 1564vs *v*(C=O), 1381m *v*(B-O), 1033s *v*(B-F). *δ*<sub>H</sub> (300 MHz; CDCl<sub>3</sub>; Me<sub>4</sub>Si)/ppm: 0.88 (12 H, t, <sup>3</sup>J 6.6, CH<sub>3</sub>), 1.26-1.48 (88 H, m, CH<sub>2</sub>), 1.71-1.89 (8 H, m, CH<sub>2</sub>), 4.06 (4 H, t, <sup>3</sup>J 6.4, OCH<sub>2</sub>), 4.07 (2 H, t, <sup>3</sup>J 6.5, OCH<sub>2</sub>), 4.09 (2 H, t, <sup>3</sup>J 6.5, OCH<sub>2</sub>), 6.96 (1 H, s, H2), 7.01 (2 H, AA'XX' system, *N* 9.0, H3' and H5'), 7.30 (2 H, s, H2'' and H6''), 8.12 (2 H, AA'XX' system, *N* 9.0, H2' and H6').

[BF<sub>2</sub>]<sub>1,3</sub>(16/16) (10): yellow solid (65%). Mp 74 °C. Elemental analysis: Found: C, 77.3; H, 10.8%. C<sub>79</sub>H<sub>139</sub>BF<sub>2</sub>O<sub>6</sub> requires C, 76.9; H, 11.3%. *v*<sub>max</sub>(solid)/cm<sup>-1</sup>: 2919vs, 2850vs *v*(C-H), 1606s *v*(C=C), 1563vs *v*(C=O), 1380m *v*(B-O), 1034s *v*(B-F). *δ*<sub>H</sub> (300 MHz; CDCl<sub>3</sub>; Me<sub>4</sub>Si)/ppm: 0.88 (12 H, t, <sup>3</sup>J 6.6, CH<sub>3</sub>), 1.26-1.48 (104 H, m, CH<sub>2</sub>), 1.73-1.87 (8 H, m, CH<sub>2</sub>), 4.05 (6 H, t, <sup>3</sup>J 6.3, OCH<sub>2</sub>), 4.09 (2 H, t, <sup>3</sup>J 6.5, OCH<sub>2</sub>), 6.96 (1 H, s, H2), 6.98 (2 H, AA'XX' system, *N* 9.0, H3' and H5'), 7.30 (2 H, s, H2'' and H6''), 8.09 (2 H, AA'XX' system, *N* 9.0, H2' and H6').

[BF<sub>2</sub>]<sub>1,3</sub>(18/18) (11): yellow solid (64%). Mp 77 °C. Elemental analysis: Found: C, 78.4; H, 11.2%. C<sub>85</sub>H<sub>151</sub>BF<sub>2</sub>O<sub>6</sub> requires C, 77.7; H, 11.6%. *v*<sub>max</sub>(solid)/cm<sup>-1</sup>: 2919vs, 2850vs *v*(C-H), 1606s *v*(C=C), 1564vs *v*(C=O), 1380m *v*(B-O), 1034s *v*(B-F). *δ*<sub>H</sub> (300 MHz; CDCl<sub>3</sub>; Me<sub>4</sub>Si)/ppm: 0.88 (12 H, t, <sup>3</sup>J 6.6, CH<sub>3</sub>), 1.25-1.48 (116 H, m, CH<sub>2</sub>), 1.71-1.87

(8 H, m, CH<sub>2</sub>), 4.06 (4 H, t, <sup>3</sup>J 6.4, OCH<sub>2</sub>), 4.07 (2 H, t, <sup>3</sup>J 6.5, OCH<sub>2</sub>), 4.10 (2 H, t, <sup>3</sup>J 6.5, OCH<sub>2</sub>), 6.96 (1 H, s, H<sub>2</sub>), 7.00 (2 H, AA'XX' system, *N* 9.0, H<sub>3</sub>' and H<sub>5</sub>'), 7.30 (2 H, s, H<sub>2</sub>'' and H<sub>6</sub>''), 8.11 (2 H, AA'XX' system, *N* 9.0, H<sub>2</sub>' and H<sub>6</sub>').

**[BF<sub>2</sub>]<sub>1,3</sub>(12/14) (12):** yellow solid (66%). Mp 60 °C. Elemental analysis: Found: C, 72.6; H, 10.2%. C<sub>69</sub>H<sub>119</sub>BF<sub>2</sub>O<sub>6</sub>(CH<sub>2</sub>Cl<sub>2</sub>)<sub>0.75</sub> requires C, 72.4; H, 10.5%.  $\nu_{\max}(\text{solid})/\text{cm}^{-1}$ : 2917vs, 2849vs  $\nu(\text{C-H})$ , 1606s  $\nu(\text{C=C})$ , 1556vs  $\nu(\text{C=O})$ , 1379m  $\nu(\text{B-O})$ , 1029s  $\nu(\text{B-F})$ .  $\delta_{\text{H}}$  (300 MHz; CDCl<sub>3</sub>; Me<sub>4</sub>Si)/ppm: 0.88 (12 H, t, <sup>3</sup>J 6.6, CH<sub>3</sub>), 1.26-1.48 (84 H, m, CH<sub>2</sub>), 1.73-1.87 (8 H, m, CH<sub>2</sub>), 4.06 (4 H, t, <sup>3</sup>J 6.4, OCH<sub>2</sub>), 4.07 (2 H, t, <sup>3</sup>J 6.4, OCH<sub>2</sub>), 4.10 (2 H, t, <sup>3</sup>J 6.4, OCH<sub>2</sub>), 6.96 (1 H, s, H<sub>2</sub>), 7.01 (2 H, AA'XX' system, *N* 9.0, H<sub>3</sub>' and H<sub>5</sub>'), 7.31 (2 H, s, H<sub>2</sub>'' and H<sub>6</sub>''), 8.11 (2 H, AA'XX' system, *N* 9.0, H<sub>2</sub>' and H<sub>6</sub>').

**[BF<sub>2</sub>]<sub>1,3</sub>(12/16) (13):** yellow solid (69%). Mp 70 °C. Elemental analysis: Found: C, 76.9; H, 10.9%. C<sub>75</sub>H<sub>131</sub>BF<sub>2</sub>O<sub>6</sub> requires C, 76.5; H, 11.2%.  $\nu_{\max}(\text{solid})/\text{cm}^{-1}$ : 2918vs, 2850vs  $\nu(\text{C-H})$ , 1605s  $\nu(\text{C=C})$ , 1555vs  $\nu(\text{C=O})$ , 1384m  $\nu(\text{B-O})$ , 1026s  $\nu(\text{B-F})$ .  $\delta_{\text{H}}$  (300 MHz; CDCl<sub>3</sub>; Me<sub>4</sub>Si)/ppm: 0.88 (12 H, t, <sup>3</sup>J 6.6, CH<sub>3</sub>), 1.26-1.48 (96 H, m, CH<sub>2</sub>), 1.78-1.89 (8 H, m, CH<sub>2</sub>), 4.06 (4 H, t, <sup>3</sup>J 6.4, OCH<sub>2</sub>), 4.07 (2 H, t, <sup>3</sup>J 6.4, OCH<sub>2</sub>), 4.10 (2 H, t, <sup>3</sup>J 6.4, OCH<sub>2</sub>), 6.96 (1 H, s, H<sub>2</sub>), 7.01 (2 H, AA'XX' system, *N* 9.0, H<sub>3</sub>' and H<sub>5</sub>'), 7.31 (2 H, s, H<sub>2</sub>'' and H<sub>6</sub>''), 8.11 (2 H, AA'XX' system, *N* 9.0, H<sub>2</sub>' and H<sub>6</sub>').

**[BF<sub>2</sub>]<sub>1,3</sub>(12/18) (14):** yellow solid (56%). Mp 65 °C. Elemental analysis: Found: C, 75.7; H, 10.7%. C<sub>81</sub>H<sub>143</sub>BF<sub>2</sub>O<sub>6</sub>(CH<sub>2</sub>Cl<sub>2</sub>)<sub>0.25</sub> requires C, 76.0; H, 11.2%.  $\nu_{\max}(\text{solid})/\text{cm}^{-1}$ : 2919vs, 2850vs  $\nu(\text{C-H})$ , 1606s  $\nu(\text{C=C})$ , 1557vs  $\nu(\text{C=O})$ , 1373m  $\nu(\text{B-O})$ , 1043s  $\nu(\text{B-F})$ .  $\delta_{\text{H}}$  (300 MHz; CDCl<sub>3</sub>; Me<sub>4</sub>Si)/ppm: 0.88 (12 H, t, <sup>3</sup>J 6.6, CH<sub>3</sub>), 1.26-1.48 (108 H, m, CH<sub>2</sub>), 1.79-1.87 (8 H, m, CH<sub>2</sub>), 4.05 (6 H, t, <sup>3</sup>J 6.4, OCH<sub>2</sub>), 4.10 (2 H, t, <sup>3</sup>J 6.5, OCH<sub>2</sub>), 6.96 (1 H, s, H<sub>2</sub>), 7.01 (2 H, AA'XX' system, *N* 9.0, H<sub>3</sub>' and H<sub>5</sub>'), 7.30 (2 H, s, H<sub>2</sub>'' and H<sub>6</sub>''), 8.11 (2 H, AA'XX' system, *N* 9.0, H<sub>2</sub>' and H<sub>6</sub>').

**Boron difluoride  $\beta$ -diketonate complexes of the type [BF<sub>2</sub>]<sub>2,3</sub>(*n/m*); *n* = *m* = 12, 14, 16, 18 (15-18); *n* = 12, *m* = 14, 16, 18 (19-21); *n* = 14, *m* = 12, 16, 18 (22-24); *n* = 16, *m* = 12, 14, 18 (25-27)**

Melting points of the compounds exhibiting liquid crystal behaviour at room temperature are omitted (see Table 4).

**[BF<sub>2</sub>]<sub>2,3</sub>(12/12) (15):** dark yellow viscous solid (48%). Mp 45 °C. Elemental analysis: Found: C, 75.5; H, 10.6%. C<sub>75</sub>H<sub>131</sub>BF<sub>2</sub>O<sub>7</sub> requires C, 75.5; H, 11.0%.  $\nu_{\max}(\text{solid})/\text{cm}^{-1}$ : 2918vs, 2851vs  $\nu(\text{C-H})$ , 1607s  $\nu(\text{C=C})$ , 1555vs  $\nu(\text{C=O})$ , 1373m  $\nu(\text{B-O})$ , 1061s  $\nu(\text{B-F})$ .  $\delta_{\text{H}}$  (300 MHz; CDCl<sub>3</sub>; Me<sub>4</sub>Si)/ppm: 0.88 (15 H, t, <sup>3</sup>J 6.7, CH<sub>3</sub>), 1.26-1.47 (90 H, m, CH<sub>2</sub>), 1.71-1.95 (10 H, m, CH<sub>2</sub>), 4.02 (4 H, t, <sup>3</sup>J 6.5, OCH<sub>2</sub>), 4.07 (4 H, t, <sup>3</sup>J 6.5, OCH<sub>2</sub>), 4.12 (2 H, t, <sup>3</sup>J 6.5, OCH<sub>2</sub>), 6.74 (1 H, t, <sup>4</sup>J 2.1, H4'), 6.99 (1 H, s, H2), 7.21 (2 H, d, <sup>4</sup>J 2.1, H2' and H6'), 7.33 (2 H, s, H2'' and H6'').

**[BF<sub>2</sub>]<sub>2,3</sub>(14/14) (16):** dark yellow viscous solid (54%). Mp 48 °C. Elemental analysis: Found: C, 76.3; H, 11.0%. C<sub>85</sub>H<sub>151</sub>BF<sub>2</sub>O<sub>7</sub> requires C, 76.5; H, 11.4%.  $\nu_{\max}(\text{solid})/\text{cm}^{-1}$ : 2917vs, 2850vs  $\nu(\text{C-H})$ , 1607s  $\nu(\text{C=C})$ , 1556vs  $\nu(\text{C=O})$ , 1372m  $\nu(\text{B-O})$ , 1066s  $\nu(\text{B-F})$ .  $\delta_{\text{H}}$  (300 MHz; CDCl<sub>3</sub>; Me<sub>4</sub>Si)/ppm: 0.88 (15 H, t, <sup>3</sup>J 6.7, CH<sub>3</sub>), 1.26-1.47 (110 H, m, CH<sub>2</sub>), 1.74-1.86 (10 H, m, CH<sub>2</sub>), 4.02 (4 H, t, <sup>3</sup>J 6.5, OCH<sub>2</sub>), 4.07 (4 H, t, <sup>3</sup>J 6.5, OCH<sub>2</sub>), 4.13 (2 H, t, <sup>3</sup>J 6.5, OCH<sub>2</sub>), 6.73 (1 H, t, <sup>4</sup>J 2.1, H4'), 6.99 (1 H, s, H2), 7.21 (2 H, d, <sup>4</sup>J 2.1, H2' and H6'), 7.33 (2 H, s, H2'' and H6'').

**[BF<sub>2</sub>]<sub>2,3</sub>(16/16) (17):** yellow solid (64%). Mp 54 °C. Elemental analysis: Found: C, 77.7; H, 11.2%. C<sub>95</sub>H<sub>171</sub>BF<sub>2</sub>O<sub>7</sub> requires C, 77.4; H, 11.6%.  $\nu_{\max}(\text{solid})/\text{cm}^{-1}$ : 2920vs, 2851vs  $\nu(\text{C-H})$ , 1608s  $\nu(\text{C=C})$ , 1561vs  $\nu(\text{C=O})$ , 1384m  $\nu(\text{B-O})$ , 1048s  $\nu(\text{B-F})$ .  $\delta_{\text{H}}$  (300 MHz; CDCl<sub>3</sub>; Me<sub>4</sub>Si)/ppm: 0.87 (15 H, t, <sup>3</sup>J 6.7, CH<sub>3</sub>), 1.25-1.47 (130 H, m, CH<sub>2</sub>), 1.70-1.89 (10 H, m, CH<sub>2</sub>), 4.01 (4 H, t, <sup>3</sup>J 6.5, OCH<sub>2</sub>), 4.06 (4 H, t, <sup>3</sup>J 6.5, OCH<sub>2</sub>), 4.11 (2 H, t, <sup>3</sup>J 6.6, OCH<sub>2</sub>), 6.73 (1 H, t, <sup>4</sup>J 2.1, H4'), 6.99 (1 H, s, H2), 7.21 (2 H, d, <sup>4</sup>J 2.1, H2' and H6'), 7.32 (2 H, s, H2'' and H6'').

**[BF<sub>2</sub>]<sub>2,3</sub>(18/18) (18):** yellow solid (59%). Mp 60 °C. Elemental analysis: Found: C, 78.7; H, 11.4%. C<sub>105</sub>H<sub>191</sub>BF<sub>2</sub>O<sub>7</sub> requires C, 78.2; H, 11.9%.  $\nu_{\max}(\text{solid})/\text{cm}^{-1}$ : 2918vs, 2850vs  $\nu(\text{C-H})$ , 1604s  $\nu(\text{C=C})$ , 1563vs  $\nu(\text{C=O})$ , 1366m  $\nu(\text{B-O})$ , 1048s  $\nu(\text{B-F})$ .  $\delta_{\text{H}}$  (300 MHz; CDCl<sub>3</sub>; Me<sub>4</sub>Si)/ppm: 0.88 (15 H, t, <sup>3</sup>J 6.7, CH<sub>3</sub>), 1.25-1.47 (150 H, m, CH<sub>2</sub>), 1.78-1.90 (10 H, m, CH<sub>2</sub>), 4.01 (4 H, t, <sup>3</sup>J 6.5, OCH<sub>2</sub>), 4.07 (4 H, t, <sup>3</sup>J 6.6, OCH<sub>2</sub>), 4.12 (2 H, t, <sup>3</sup>J 6.6, OCH<sub>2</sub>), 6.74 (1 H, t, <sup>4</sup>J 2.1, H4'), 6.99 (1 H, s, H2), 7.21 (2 H, d, <sup>4</sup>J 2.1, H2' and H6'), 7.33 (2 H, s, H2'' and H6'').

**[BF<sub>2</sub>]<sub>2,3</sub>(12/14) (19):** dark yellow viscous (36%). Elemental analysis: Found: C, 75.3; H, 11.2%. C<sub>81</sub>H<sub>143</sub>BF<sub>2</sub>O<sub>7</sub>(CH<sub>2</sub>Cl<sub>2</sub>)<sub>0.2</sub> requires C, 75.3; H, 11.1%.  $\nu_{\max}(\text{solid})/\text{cm}^{-1}$ : 2918vs, 2850vs  $\nu(\text{C-H})$ , 1608s  $\nu(\text{C=C})$ , 1555vs  $\nu(\text{C=O})$ , 1371m  $\nu(\text{B-O})$ , 1066s  $\nu(\text{B-F})$ .  $\delta_{\text{H}}$  (300

MHz; CDCl<sub>3</sub>; Me<sub>4</sub>Si)/ppm: 0.88 (15 H, t, <sup>3</sup>J 6.7, CH<sub>3</sub>), 1.26-1.47 (102 H, m, CH<sub>2</sub>), 1.71-1.90 (10 H, m, CH<sub>2</sub>), 4.02 (4 H, t, <sup>3</sup>J 6.5, OCH<sub>2</sub>), 4.06 (2 H, t, <sup>3</sup>J 6.5, OCH<sub>2</sub>), 4.12 (2 H, t, <sup>3</sup>J 6.6, OCH<sub>2</sub>), 6.73 (1 H, t, <sup>4</sup>J 2.1, H4'), 6.99 (1 H, s, H2), 7.20 (2 H, d, <sup>4</sup>J 2.1, H2' and H6'), 7.32 (2 H, s, H2'' and H6'').

**[BF<sub>2</sub>]<sub>2,3</sub>(12/16) (20):** dark yellow viscous (42%). Elemental analysis: Found: C, 76.8; H, 11.1%. C<sub>87</sub>H<sub>155</sub>BF<sub>2</sub>O<sub>7</sub> requires C, 76.7; H, 11.4%.  $\nu_{\max}(\text{solid})/\text{cm}^{-1}$ : 2918vs, 2850vs  $\nu(\text{C-H})$ , 1606s  $\nu(\text{C=C})$ , 1562vs  $\nu(\text{C=O})$ , 1377m  $\nu(\text{B-O})$ , 1047s  $\nu(\text{B-F})$ .  $\delta_{\text{H}}$  (300 MHz; CDCl<sub>3</sub>; Me<sub>4</sub>Si)/ppm: 0.88 (15 H, t, <sup>3</sup>J 6.7, CH<sub>3</sub>), 1.25-1.47 (114 H, m, CH<sub>2</sub>), 1.73-1.90 (10 H, m, CH<sub>2</sub>), 4.02 (4 H, t, <sup>3</sup>J 6.5, OCH<sub>2</sub>), 4.07 (2 H, t, <sup>3</sup>J 6.5, OCH<sub>2</sub>), 4.12 (2 H, t, <sup>3</sup>J 6.5, OCH<sub>2</sub>), 6.74 (1 H, t, <sup>4</sup>J 2.1, H4'), 6.99 (1 H, s, H2), 7.21 (2 H, d, <sup>4</sup>J 2.1, H2' and H6'), 7.33 (2 H, s, H2'' and H6'').

**[BF<sub>2</sub>]<sub>2,3</sub>(12/18) (21):** dark yellow viscous (47%). Elemental analysis: Found: C, 77.3; H, 11.2%. C<sub>93</sub>H<sub>167</sub>BF<sub>2</sub>O<sub>7</sub> requires C, 77.2; H, 11.6%.  $\nu_{\max}(\text{solid})/\text{cm}^{-1}$ : 2918vs, 2850vs  $\nu(\text{C-H})$ , 1606s  $\nu(\text{C=C})$ , 1560vs  $\nu(\text{C=O})$ , 1377m  $\nu(\text{B-O})$ , 1053s  $\nu(\text{B-F})$ .  $\delta_{\text{H}}$  (300 MHz; CDCl<sub>3</sub>; Me<sub>4</sub>Si)/ppm: 0.88 (15 H, t, <sup>3</sup>J 6.7, CH<sub>3</sub>), 1.25-1.47 (126 H, m, CH<sub>2</sub>), 1.75-1.90 (10 H, m, CH<sub>2</sub>), 4.02 (4 H, t, <sup>3</sup>J 6.5, OCH<sub>2</sub>), 4.07 (2 H, t, <sup>3</sup>J 6.5, OCH<sub>2</sub>), 4.12 (2 H, t, <sup>3</sup>J 6.5, OCH<sub>2</sub>), 6.74 (1 H, t, <sup>4</sup>J 2.1, H4'), 6.99 (1 H, s, H2), 7.21 (2 H, d, <sup>4</sup>J 2.1, H2' and H6'), 7.33 (2 H, s, H2'' and H6'').

**[BF<sub>2</sub>]<sub>2,3</sub>(14/12) (22):** dark yellow viscous (43%). Elemental analysis: Found: C, 76.4; H, 10.4%. C<sub>79</sub>H<sub>139</sub>BF<sub>2</sub>O<sub>7</sub> requires C, 75.9; H, 11.2%.  $\nu_{\max}(\text{solid})/\text{cm}^{-1}$ : 2920vs, 2821vs  $\nu(\text{C-H})$ , 1606s  $\nu(\text{C=C})$ , 1555vs  $\nu(\text{C=O})$ , 1376m  $\nu(\text{B-O})$ , 1066s  $\nu(\text{B-F})$ .  $\delta_{\text{H}}$  (300 MHz; CDCl<sub>3</sub>; Me<sub>4</sub>Si)/ppm: 0.88 (15 H, t, <sup>3</sup>J 6.7, CH<sub>3</sub>), 1.26-1.47 (98 H, m, CH<sub>2</sub>), 1.71-1.90 (10 H, m, CH<sub>2</sub>), 4.02 (4 H, t, <sup>3</sup>J 6.5, OCH<sub>2</sub>), 4.07 (2 H, t, <sup>3</sup>J 6.5, OCH<sub>2</sub>), 4.12 (2 H, t, <sup>3</sup>J 6.5, OCH<sub>2</sub>), 6.74 (1 H, t, <sup>4</sup>J 2.1, H4'), 6.99 (1 H, s, H2), 7.21 (2 H, d, <sup>4</sup>J 2.1, H2' and H6'), 7.33 (2 H, s, H2'' and H6'').

**[BF<sub>2</sub>]<sub>2,3</sub>(14/16) (23):** dark yellow viscous (52%). Elemental analysis: Found: C, 77.4; H, 11.2%. C<sub>91</sub>H<sub>163</sub>BF<sub>2</sub>O<sub>7</sub> requires C, 77.1; H, 11.6%.  $\nu_{\max}(\text{solid})/\text{cm}^{-1}$ : 2918vs, 2850vs  $\nu(\text{C-H})$ , 1607s  $\nu(\text{C=C})$ , 1559vs  $\nu(\text{C=O})$ , 1373m  $\nu(\text{B-O})$ , 1052s  $\nu(\text{B-F})$ .  $\delta_{\text{H}}$  (300 MHz; CDCl<sub>3</sub>; Me<sub>4</sub>Si)/ppm: 0.87 (15 H, t, <sup>3</sup>J 6.7, CH<sub>3</sub>), 1.27-1.47 (122 H, m, CH<sub>2</sub>), 1.73-1.88 (10 H, m, CH<sub>2</sub>), 4.01 (4 H, t, <sup>3</sup>J 6.5, OCH<sub>2</sub>), 4.07 (2 H, t, <sup>3</sup>J 6.5, OCH<sub>2</sub>), 4.12 (2 H, t, <sup>3</sup>J 6.5,

OCH<sub>2</sub>), 6.74 (1 H, t, <sup>4</sup>J 2.1, H4'), 6.99 (1 H, s, H2), 7.21 (2 H, d, <sup>4</sup>J 2.1, H2' and H6'), 7.33 (2 H, s, H2'' and H6'').

**[BF<sub>2</sub>]<sub>2,3</sub>(14/18) (24):** dark yellow viscous (39%). Elemental analysis: Found: C, 78.1; H, 11.4%. C<sub>97</sub>H<sub>175</sub>BF<sub>2</sub>O<sub>7</sub> requires C, 77.6; H, 11.7%.  $\nu_{\max}(\text{solid})/\text{cm}^{-1}$ : 2918vs, 2850vs  $\nu(\text{C-H})$ , 1607s  $\nu(\text{C=C})$ , 1562vs  $\nu(\text{C=O})$ , 1377m  $\nu(\text{B-O})$ , 1050s  $\nu(\text{B-F})$ .  $\delta_{\text{H}}$  (300 MHz; CDCl<sub>3</sub>; Me<sub>4</sub>Si)/ppm: 0.88 (15 H, t, <sup>3</sup>J 6.7, CH<sub>3</sub>), 1.26-1.47 (134 H, m, CH<sub>2</sub>), 1.76-1.90 (10 H, m, CH<sub>2</sub>), 4.02 (4 H, t, <sup>3</sup>J 6.5, OCH<sub>2</sub>), 4.07 (2 H, t, <sup>3</sup>J 6.5, OCH<sub>2</sub>), 4.12 (2 H, t, <sup>3</sup>J 6.5, OCH<sub>2</sub>), 6.74 (1 H, t, <sup>4</sup>J 2.1, H4'), 6.99 (1 H, s, H2), 7.21 (2 H, d, <sup>4</sup>J 2.1, H2' and H6'), 7.33 (2 H, s, H2'' and H6'').

**[BF<sub>2</sub>]<sub>2,3</sub>(16/12) (25):** dark yellow viscous (42%). Elemental analysis: Found: C, 75.0; H, 10.7%. C<sub>83</sub>H<sub>147</sub>BF<sub>2</sub>O<sub>7</sub>(CH<sub>2</sub>Cl<sub>2</sub>)<sub>0.25</sub> requires C, 75.3; H, 11.2%.  $\nu_{\max}(\text{solid})/\text{cm}^{-1}$ : 2918vs, 2850vs  $\nu(\text{C-H})$ , 1607s  $\nu(\text{C=C})$ , 1556vs  $\nu(\text{C=O})$ , 1371m  $\nu(\text{B-O})$ , 1063s  $\nu(\text{B-F})$ .  $\delta_{\text{H}}$  (300 MHz; CDCl<sub>3</sub>; Me<sub>4</sub>Si)/ppm: 0.88 (15 H, t, <sup>3</sup>J 6.7, CH<sub>3</sub>), 1.26-1.47 (106 H, m, CH<sub>2</sub>), 1.73-1.83 (10 H, m, CH<sub>2</sub>), 4.01 (4 H, t, <sup>3</sup>J 6.5, OCH<sub>2</sub>), 4.06 (2 H, t, <sup>3</sup>J 6.5, OCH<sub>2</sub>), 4.11 (2 H, t, <sup>3</sup>J 6.5, OCH<sub>2</sub>), 6.74 (1 H, t, <sup>4</sup>J 2.1, H4'), 6.99 (1 H, s, H2), 7.21 (2 H, d, <sup>4</sup>J 2.1, H2' and H6'), 7.33 (2 H, s, H2'' and H6'').

**[BF<sub>2</sub>]<sub>2,3</sub>(16/14) (26):** dark yellow viscous (50%). Elemental analysis: Found: C, 77.3; H, 11.2%. C<sub>89</sub>H<sub>159</sub>BF<sub>2</sub>O<sub>7</sub> requires C, 76.9; H, 11.5%.  $\nu_{\max}(\text{solid})/\text{cm}^{-1}$ : 2918vs, 2850vs  $\nu(\text{C-H})$ , 1604s  $\nu(\text{C=C})$ , 1562vs  $\nu(\text{C=O})$ , 1371m  $\nu(\text{B-O})$ , 1063s  $\nu(\text{B-F})$ .  $\delta_{\text{H}}$  (300 MHz; CDCl<sub>3</sub>; Me<sub>4</sub>Si)/ppm: 0.87 (15 H, t, <sup>3</sup>J 6.7, CH<sub>3</sub>), 1.26-1.47 (118 H, m, CH<sub>2</sub>), 1.71-1.88 (10 H, m, CH<sub>2</sub>), 4.02 (4 H, t, <sup>3</sup>J 6.5, OCH<sub>2</sub>), 4.07 (2 H, t, <sup>3</sup>J 6.5, OCH<sub>2</sub>), 4.12 (2 H, t, <sup>3</sup>J 6.5, OCH<sub>2</sub>), 6.73 (1 H, t, <sup>4</sup>J 2.1, H4'), 6.99 (1 H, s, H2), 7.21 (2 H, d, <sup>4</sup>J 2.1, H2' and H6'), 7.32 (2 H, s, H2'' and H6'').

**[BF<sub>2</sub>]<sub>2,3</sub>(16/18) (27):** dark yellow viscous (41%). Elemental analysis: Found: C, 77.8; H, 11.4%. C<sub>101</sub>H<sub>183</sub>BF<sub>2</sub>O<sub>7</sub> requires C, 77.8; H, 11.8%.  $\nu_{\max}(\text{solid})/\text{cm}^{-1}$ : 2918vs, 2850vs  $\nu(\text{C-H})$ , 1605s  $\nu(\text{C=C})$ , 1561vs  $\nu(\text{C=O})$ , 1377m  $\nu(\text{B-O})$ , 1052s  $\nu(\text{B-F})$ .  $\delta_{\text{H}}$  (300 MHz; CDCl<sub>3</sub>; Me<sub>4</sub>Si)/ppm: 0.88 (15 H, t, <sup>3</sup>J 6.7, CH<sub>3</sub>), 1.26-1.47 (142 H, m, CH<sub>2</sub>), 1.78-1.87 (10 H, m, CH<sub>2</sub>), 4.02 (4 H, t, <sup>3</sup>J 6.5, OCH<sub>2</sub>), 4.07 (2 H, t, <sup>3</sup>J 6.5, OCH<sub>2</sub>), 4.12 (2 H, t, <sup>3</sup>J 6.5, OCH<sub>2</sub>), 6.74 (1 H, t, <sup>4</sup>J 2.1, H4'), 6.99 (1 H, s, H2), 7.21 (2 H, d, <sup>4</sup>J 2.1, H2' and H6'), 7.33 (2 H, s, H2'' and H6'').

## Precursor $\beta$ -diketone ligands

The  $\beta$ -diketones were synthesised by adapting literature methods and fully characterised according to the previous results when corresponding.<sup>34-37</sup> Specifically, compounds D<sub>1,2</sub>(12/12), D<sub>1,2</sub>(12/14), D<sub>2,3</sub>(12/12), D<sub>2,3</sub>(14/14), D<sub>2,3</sub>(12/14), D<sub>2,3</sub>(14/12), D<sub>2,3</sub>(14/16), D<sub>2,3</sub>(14/18), D<sub>2,3</sub>(16/12), D<sub>2,3</sub>(16/14) and D<sub>2,3</sub>(16/18) needed an additional procedure in order to be purified. The reaction crude was neutralised with diluted HCl and extracted with diethyl ether (2 x 50 mL). The ethereal fraction was washed with water (4 x 50 mL) and dried under anhydrous MgSO<sub>4</sub>. For the diketones D<sub>1,2</sub>(12/12), D<sub>1,2</sub>(12/14), D<sub>2,3</sub>(12/12), D<sub>2,3</sub>(14/14), and D<sub>2,3</sub>(12/14), the ethereal solution was evaporated to give a waxy yellow solid.

However, for D<sub>2,3</sub>(14/12), D<sub>2,3</sub>(14/16), D<sub>2,3</sub>(14/18), D<sub>2,3</sub>(16/12), D<sub>2,3</sub>(16/14) and D<sub>2,3</sub>(16/18), the oily residue after removing the solvent was purified by silica chromatography with a 10/1 hexane-ethyl acetate mixture as an eluent. The final yellow solids were crystallised from dichloromethane/methanol.

Full characterisation of the new ligands is given as follows. In general, the  $\beta$ -diketone ligands tend to crystallise with a variable amount of water as it may be observed in the analytical data.

### Diketones of the type D<sub>1,2</sub>(*n/m*); *n* = *m* = 18; *n* = 12, *m* = 14, 16, 18

**D<sub>1,2</sub>(18/18):** pale yellow solid (45%). Mp 65 °C. Elemental analysis: Found: C, 74.9; H, 11.3%. C<sub>69</sub>H<sub>120</sub>O<sub>5</sub>·4H<sub>2</sub>O requires C, 75.2; H, 11.7%.  $\nu_{\max}(\text{solid})/\text{cm}^{-1}$ : 3380w  $\nu(\text{O-H})$ , 2917vs, 2850vs  $\nu(\text{C-H})$ , 1687w  $\nu(\text{C=O})$ , 1604s  $\nu(\text{C=C})$ .  $\delta_{\text{H}}$  (300 MHz; CDCl<sub>3</sub>; Me<sub>4</sub>Si)/ppm: 0.88 (9 H, t, <sup>3</sup>J 6.6, CH<sub>3</sub>), 1.25-1.48 (90 H, m, CH<sub>2</sub>), 1.80 (6 H, m, CH<sub>2</sub>), 3.97-4.04 (6 H, m, OCH<sub>2</sub>), 6.62 (1 H, t, <sup>4</sup>J 2.1, H4''), 6.73 (1 H, s, H2), 6.96 (2 H, AA'XX' system, *N* 8.9, H3' and H5'), 7.08 (2 H, d, <sup>4</sup>J 2.1, H2'' and H6''), 7.95 (2 H, AA'XX' system, *N* 8.9, H2' and H6'), 16.97 (1 H, s, OH).

**D<sub>1,2</sub>(12/14):** pale yellow solid (45%). Mp 52 °C. Elemental analysis: Found: C, 77.6; H, 10.7%. C<sub>55</sub>H<sub>92</sub>O<sub>5</sub>·H<sub>2</sub>O requires C, 77.6; H, 11.1%.  $\nu_{\max}(\text{solid})/\text{cm}^{-1}$ : 3378w  $\nu(\text{O-H})$ , 2917vs, 2850vs  $\nu(\text{C-H})$ , 1687w  $\nu(\text{C=O})$ , 1604s  $\nu(\text{C=C})$ .  $\delta_{\text{H}}$  (300 MHz; CDCl<sub>3</sub>; Me<sub>4</sub>Si)/ppm: 0.87 (9 H, t, <sup>3</sup>J 6.6, CH<sub>3</sub>), 1.26-1.48 (52 H, m, CH<sub>2</sub>), 1.78 (6 H, m, CH<sub>2</sub>), 3.95-4.02 (6 H, m, OCH<sub>2</sub>), 6.61 (1 H, t, <sup>4</sup>J 2.1, H4''), 6.73 (1 H, s, H2), 6.96 (2 H,



AA'XX' system, *N* 8.9, H3' and H5'), 7.08 (2 H, d, <sup>4</sup>*J* 2.1, H2'' and H6''), 7.94 (2 H, AA'XX' system, *N* 8.9, H2' and H6'), 16.97 (1 H, s, OH).

**D<sub>1,2</sub>(12/16):** pale yellow solid (58%). Mp 62 °C. Elemental analysis: Found: C, 76.6; H, 10.9%. C<sub>59</sub>H<sub>100</sub>O<sub>5</sub>·2H<sub>2</sub>O requires C, 76.6; H, 11.3%.  $\nu_{\max}(\text{solid})/\text{cm}^{-1}$ : 3377w  $\nu(\text{O-H})$ , 2917vs, 2850vs  $\nu(\text{C-H})$ , 1689w  $\nu(\text{C=O})$ , 1603s  $\nu(\text{C=C})$ .  $\delta_{\text{H}}$  (300 MHz; CDCl<sub>3</sub>; Me<sub>4</sub>Si)/ppm: 0.88 (9 H, t, <sup>3</sup>*J* 6.6, CH<sub>3</sub>), 1.26-1.48 (70 H, m, CH<sub>2</sub>), 1.79 (6 H, m, CH<sub>2</sub>), 3.97-4.05 (6 H, m, OCH<sub>2</sub>), 6.63 (1 H, t, <sup>4</sup>*J* 2.1, H4''), 6.73 (1 H, s, H2), 6.92 (2 H, AA'XX' system, *N* 8.9, H3' and H5'), 7.06 (2 H, d, <sup>4</sup>*J* 2.1, H2'' and H6''), 8.00 (2 H, AA'XX' system, *N* 8.9, H2' and H6'), 17.01 (1 H, s, OH).

**D<sub>1,2</sub>(12/18):** pale yellow solid (53%). Mp 56 °C. Elemental analysis: Found: C, 78.8; H, 11.2%. C<sub>63</sub>H<sub>108</sub>O<sub>5</sub>·H<sub>2</sub>O requires C, 78.6; H, 11.5%.  $\nu_{\max}(\text{solid})/\text{cm}^{-1}$ : 3357w  $\nu(\text{O-H})$ , 2917vs, 2850vs  $\nu(\text{C-H})$ , 1688w  $\nu(\text{C=O})$ , 1605s  $\nu(\text{C=C})$ .  $\delta_{\text{H}}$  (300 MHz; CDCl<sub>3</sub>; Me<sub>4</sub>Si)/ppm: 0.88 (9 H, t, <sup>3</sup>*J* 6.6, CH<sub>3</sub>), 1.26-1.48 (78 H, m, CH<sub>2</sub>), 1.79 (6 H, m, CH<sub>2</sub>), 3.97-4.05 (6 H, m, OCH<sub>2</sub>), 6.62 (1 H, t, <sup>4</sup>*J* 2.1, H4''), 6.73 (1 H, s, H2), 6.94 (2 H, AA'XX' system, *N* 8.9, H3' and H5'), 7.08 (2 H, d, <sup>4</sup>*J* 2.1, H2'' and H6''), 7.95 (2 H, AA'XX' system, *N* 8.9, H2' and H6'), 16.97 (1 H, s, OH).

#### **Diketones of the type D<sub>1,3</sub>(*n/m*); *n* = *m* = 18; *n* = 12, *m* = 14, 16, 18**

**D<sub>1,3</sub>(18/18):** pale yellow solid (52%). Mp 80 °C. Elemental analysis: Found: C, 78.2; H, 11.6%. C<sub>85</sub>H<sub>152</sub>O<sub>6</sub>·2H<sub>2</sub>O requires C, 78.3; H, 12.0%.  $\nu_{\max}(\text{solid})/\text{cm}^{-1}$ : 3376w  $\nu(\text{O-H})$ , 2917vs, 2849vs  $\nu(\text{C-H})$ , 1683w  $\nu(\text{C=O})$ , 1605s  $\nu(\text{C=C})$ .  $\delta_{\text{H}}$  (300 MHz; CDCl<sub>3</sub>; Me<sub>4</sub>Si)/ppm: 0.87 (12 H, t, <sup>3</sup>*J* 6.7, CH<sub>3</sub>), 1.25-1.47 (116 H, m, CH<sub>2</sub>), 1.75-1.86 (8 H, m, CH<sub>2</sub>), 4.00-4.08 (8 H, m, OCH<sub>2</sub>), 6.68 (1 H, s, H2), 6.96 (2 H, AA'XX' system, *N* 8.9, H3' and H5'), 7.17 (2 H, s, H2'' and H6''), 7.95 (2 H, AA'XX' system, *N* 8.9, H2' and H6'), 17.17 (1 H, s, OH).

**D<sub>1,3</sub>(12/14):** pale yellow solid (54%). Mp 67 °C. Elemental analysis: Found: C, 77.4; H, 11.0%. C<sub>69</sub>H<sub>120</sub>O<sub>6</sub>·H<sub>2</sub>O requires C, 77.9; H, 11.5%.  $\nu_{\max}(\text{solid})/\text{cm}^{-1}$ : 3386w  $\nu(\text{O-H})$ , 2918vs, 2850vs  $\nu(\text{C-H})$ , 1681w  $\nu(\text{C=O})$ , 1605s  $\nu(\text{C=C})$ .  $\delta_{\text{H}}$  (300 MHz; CDCl<sub>3</sub>; Me<sub>4</sub>Si)/ppm: 0.88 (12 H, t, <sup>3</sup>*J* 6.7, CH<sub>3</sub>), 1.26-1.47 (84 H, m, CH<sub>2</sub>), 1.70-1.86 (8 H, m, CH<sub>2</sub>), 4.00-4.06 (8 H, m, OCH<sub>2</sub>), 6.68 (1 H, s, H2), 6.96 (2 H, AA'XX' system, *N* 8.9, H3' and H5'), 7.17 (2 H, s, H2'' and H6''), 7.95 (2 H, AA'XX' system, *N* 8.9, H2' and H6'), 17.11 (1 H, s, OH).

**D<sub>1,3</sub>(12/16):** pale yellow solid (72%). Mp 76 °C. Elemental analysis: Found: C, 78.3; H, 11.3%. C<sub>75</sub>H<sub>132</sub>O<sub>6</sub>·H<sub>2</sub>O requires C, 78.5; H, 11.7%.  $\nu_{\max}(\text{solid})/\text{cm}^{-1}$ : 3392w  $\nu(\text{O-H})$ , 2917vs, 2850vs  $\nu(\text{C-H})$ , 1682w  $\nu(\text{C=O})$ , 1605s  $\nu(\text{C=C})$ .  $\delta_{\text{H}}$  (300 MHz; CDCl<sub>3</sub>; Me<sub>4</sub>Si)/ppm: 0.87 (12 H, t, <sup>3</sup>J 6.7, CH<sub>3</sub>), 1.25-1.47 (96 H, m, CH<sub>2</sub>), 1.77-1.86 (8 H, m, CH<sub>2</sub>), 3.99-4.05 (8 H, m, OCH<sub>2</sub>), 6.68 (1 H, s, H<sub>2</sub>), 6.96 (2 H, AA'XX' system, N 8.9, H<sub>3</sub>' and H<sub>5</sub>'), 7.17 (2 H, s, H<sub>2</sub>'' and H<sub>6</sub>''), 7.95 (2 H, AA'XX' system, N 8.9, H<sub>2</sub>' and H<sub>6</sub>'), 17.12 (1 H, s, OH).

**D<sub>1,3</sub>(12/18):** pale yellow solid (68%). Mp 79 °C. Elemental analysis: Found: C, 78.6; H, 11.5%. C<sub>81</sub>H<sub>144</sub>O<sub>6</sub>·H<sub>2</sub>O requires C, 78.9; H, 11.9%.  $\nu_{\max}(\text{solid})/\text{cm}^{-1}$ : 3387w  $\nu(\text{O-H})$ , 2917vs, 2850vs  $\nu(\text{C-H})$ , 1683w  $\nu(\text{C=O})$ , 1606s  $\nu(\text{C=C})$ .  $\delta_{\text{H}}$  (300 MHz; CDCl<sub>3</sub>; Me<sub>4</sub>Si)/ppm: 0.87 (12 H, t, <sup>3</sup>J 6.7, CH<sub>3</sub>), 1.25-1.47 (108 H, m, CH<sub>2</sub>), 1.77-1.85 (8 H, m, CH<sub>2</sub>), 3.99-4.05 (8 H, m, OCH<sub>2</sub>), 6.68 (1 H, s, H<sub>2</sub>), 6.96 (2 H, AA'XX' system, N 8.9, H<sub>3</sub>' and H<sub>5</sub>'), 7.17 (2 H, s, H<sub>2</sub>'' and H<sub>6</sub>''), 7.95 (2 H, AA'XX' system, N 8.9, H<sub>2</sub>' and H<sub>6</sub>'), 17.11 (1 H, s, OH).

**Diketones of the type D<sub>2,3</sub>(n/m); n = m = 12, 14, 16, 18; n = 12, m = 14, 16, 18; n = 14, m = 12, 16, 18; n = 16, m = 12, 14, 18**

**D<sub>2,3</sub>(12/12):** dark yellow viscous solid (45%). Mp 52 °C. Elemental analysis: Found: C, 79.0; H, 11.1%. C<sub>75</sub>H<sub>132</sub>O<sub>7</sub> requires C, 78.6; H, 11.6%.  $\nu_{\max}(\text{solid})/\text{cm}^{-1}$ : 3362w  $\nu(\text{O-H})$ , 2918vs, 2850vs  $\nu(\text{C-H})$ , 1682w  $\nu(\text{C=O})$ , 1591s  $\nu(\text{C=C})$ .  $\delta_{\text{H}}$  (300 MHz; CDCl<sub>3</sub>; Me<sub>4</sub>Si)/ppm: 0.88 (15 H, t, <sup>3</sup>J 6.6, CH<sub>3</sub>), 1.26-1.47 (90 H, m, CH<sub>2</sub>), 1.78-1.88 (10 H, m, CH<sub>2</sub>), 3.98-4.08 (10 H, m, OCH<sub>2</sub>), 6.63 (1 H, t, <sup>4</sup>J 2.0, H<sub>4</sub>'), 6.69 (1 H, s, H<sub>2</sub>), 7.08 (2 H, d, <sup>4</sup>J 2.0, H<sub>2</sub>' and H<sub>6</sub>'), 7.18 (2 H, s, H<sub>2</sub>'' and H<sub>6</sub>''), 16.99 (1 H, s, OH).

**D<sub>2,3</sub>(14/14):** pale yellow solid (58%). Mp 63 °C. Elemental analysis: Found: C, 78.9; H, 11.3%. C<sub>85</sub>H<sub>152</sub>O<sub>7</sub>·0.5H<sub>2</sub>O requires C, 78.8; H, 11.9%.  $\nu_{\max}(\text{solid})/\text{cm}^{-1}$ : 3382w  $\nu(\text{O-H})$ , 2917vs, 2849vs  $\nu(\text{C-H})$ , 1683w  $\nu(\text{C=O})$ , 1588s  $\nu(\text{C=C})$ .  $\delta_{\text{H}}$  (300 MHz; CDCl<sub>3</sub>; Me<sub>4</sub>Si)/ppm: 0.88 (15 H, t, <sup>3</sup>J 6.6, CH<sub>3</sub>), 1.26-1.47 (110 H, m, CH<sub>2</sub>), 1.75-1.82 (10 H, m, CH<sub>2</sub>), 4.00-4.06 (10 H, m, OCH<sub>2</sub>), 6.63 (1 H, t, <sup>4</sup>J 2.0, H<sub>4</sub>'), 6.69 (1 H, s, H<sub>2</sub>), 7.08 (2 H, d, <sup>4</sup>J 2.0, H<sub>2</sub>' and H<sub>6</sub>'), 7.18 (2 H, s, H<sub>2</sub>'' and H<sub>6</sub>''), 16.97 (1 H, s, OH).

**D<sub>2,3</sub>(16/16):** pale yellow solid (53%). Mp 75 °C. Elemental analysis: Found: C, 78.8; H, 11.7%. C<sub>95</sub>H<sub>172</sub>O<sub>7</sub>·H<sub>2</sub>O requires C, 79.0; H, 12.1%.  $\nu_{\max}(\text{solid})/\text{cm}^{-1}$ : 3402w  $\nu(\text{O-H})$ , 2917vs, 2849vs  $\nu(\text{C-H})$ , 1683w  $\nu(\text{C=O})$ , 1587s  $\nu(\text{C=C})$ .  $\delta_{\text{H}}$  (300 MHz; CDCl<sub>3</sub>;

Me<sub>4</sub>Si)/ppm: 0.88 (15 H, t, <sup>3</sup>J 6.6, CH<sub>3</sub>), 1.25-1.47 (130 H, m, CH<sub>2</sub>), 1.78-1.84 (10 H, m, CH<sub>2</sub>), 3.98-4.08 (10 H, m, OCH<sub>2</sub>), 6.63 (1 H, t, <sup>4</sup>J 2.0, H<sub>4</sub>'), 6.68 (1 H, s, H<sub>2</sub>), 7.08 (2 H, d, <sup>4</sup>J 2.0, H<sub>2</sub>' and H<sub>6</sub>'), 7.18 (2 H, s, H<sub>2</sub>'' and H<sub>6</sub>''), 16.97 (1 H, s, OH).

**D<sub>2,3</sub>(18/18):** pale yellow solid (61%). Mp 80 °C. Elemental analysis: Found: C, 77.6; H, 11.8%. C<sub>105</sub>H<sub>192</sub>O<sub>7</sub>·3H<sub>2</sub>O requires C, 77.8; H, 12.2%.  $\nu_{\max}(\text{solid})/\text{cm}^{-1}$ : 3377w  $\nu(\text{O-H})$ , 2917vs, 2850vs  $\nu(\text{C-H})$ , 1683w  $\nu(\text{C=O})$ , 1588s  $\nu(\text{C=C})$ .  $\delta_{\text{H}}$  (300 MHz; CDCl<sub>3</sub>; Me<sub>4</sub>Si)/ppm: 0.87 (15 H, t, <sup>3</sup>J 6.6, CH<sub>3</sub>), 1.25-1.47 (150 H, m, CH<sub>2</sub>), 1.73-1.86 (10 H, m, CH<sub>2</sub>), 3.98-4.08 (10 H, m, OCH<sub>2</sub>), 6.63 (1 H, t, <sup>4</sup>J 2.0, H<sub>4</sub>'), 6.68 (1 H, s, H<sub>2</sub>), 7.08 (2 H, d, <sup>4</sup>J 2.0, H<sub>2</sub>' and H<sub>6</sub>'), 7.18 (2 H, s, H<sub>2</sub>'' and H<sub>6</sub>''), 16.97 (1 H, s, OH).

**D<sub>2,3</sub>(12/14):** pale yellow solid (52%). Mp 64 °C. Elemental analysis: Found: C, 78.7; H, 11.1%. C<sub>81</sub>H<sub>144</sub>O<sub>7</sub> requires C, 79.0; H, 11.2%.  $\nu_{\max}(\text{solid})/\text{cm}^{-1}$ : 3377w  $\nu(\text{O-H})$ , 2918vs, 2850vs  $\nu(\text{C-H})$ , 1683w  $\nu(\text{C=O})$ , 1589s  $\nu(\text{C=C})$ .  $\delta_{\text{H}}$  (300 MHz; CDCl<sub>3</sub>; Me<sub>4</sub>Si)/ppm: 0.88 (15 H, t, <sup>3</sup>J 6.6, CH<sub>3</sub>), 1.25-1.47 (102 H, m, CH<sub>2</sub>), 1.73-1.86 (10 H, m, CH<sub>2</sub>), 3.98-4.08 (10 H, m, OCH<sub>2</sub>), 6.63 (1 H, t, <sup>4</sup>J 2.0, H<sub>4</sub>'), 6.68 (1 H, s, H<sub>2</sub>), 7.08 (2 H, d, <sup>4</sup>J 2.0, H<sub>2</sub>' and H<sub>6</sub>'), 7.18 (2 H, s, H<sub>2</sub>'' and H<sub>6</sub>''), 16.98 (1 H, s, OH).

**D<sub>2,3</sub>(12/16):** pale yellow solid (60%). Mp 77 °C. Elemental analysis: Found: C, 77.9; H, 11.2%. C<sub>87</sub>H<sub>156</sub>O<sub>7</sub>·H<sub>2</sub>O requires C, 77.6; H, 11.7%.  $\nu_{\max}(\text{solid})/\text{cm}^{-1}$ : 3378w  $\nu(\text{O-H})$ , 2918vs, 2849vs  $\nu(\text{C-H})$ , 1683w  $\nu(\text{C=O})$ , 1588s  $\nu(\text{C=C})$ .  $\delta_{\text{H}}$  (300 MHz; CDCl<sub>3</sub>; Me<sub>4</sub>Si)/ppm: 0.88 (15 H, t, <sup>3</sup>J 6.6, CH<sub>3</sub>), 1.25-1.47 (114 H, m, CH<sub>2</sub>), 1.73-1.86 (10 H, m, CH<sub>2</sub>), 3.98-4.08 (10 H, m, OCH<sub>2</sub>), 6.63 (1 H, t, <sup>4</sup>J 2.0, H<sub>4</sub>'), 6.68 (1 H, s, H<sub>2</sub>), 7.08 (2 H, d, <sup>4</sup>J 2.0, H<sub>2</sub>' and H<sub>6</sub>'), 7.18 (2 H, s, H<sub>2</sub>'' and H<sub>6</sub>''), 16.99 (1 H, s, OH).

**D<sub>2,3</sub>(12/18):** dark yellow viscous solid (67%). Mp 82 °C. Elemental analysis: Found: C, 78.1; H, 11.4%. C<sub>93</sub>H<sub>168</sub>O<sub>7</sub>·H<sub>2</sub>O requires C, 78.0; H, 11.9%.  $\nu_{\max}(\text{solid})/\text{cm}^{-1}$ : 3376w  $\nu(\text{O-H})$ , 2918vs, 2850vs  $\nu(\text{C-H})$ , 1683w  $\nu(\text{C=O})$ , 1587s  $\nu(\text{C=C})$ .  $\delta_{\text{H}}$  (300 MHz; CDCl<sub>3</sub>; Me<sub>4</sub>Si)/ppm: 0.88 (15 H, t, <sup>3</sup>J 6.6, CH<sub>3</sub>), 1.25-1.47 (126 H, m, CH<sub>2</sub>), 1.75-1.86 (10 H, m, CH<sub>2</sub>), 3.98-4.08 (10 H, m, OCH<sub>2</sub>), 6.63 (1 H, t, <sup>4</sup>J 2.0, H<sub>4</sub>'), 6.68 (1 H, s, H<sub>2</sub>), 7.08 (2 H, d, <sup>4</sup>J 2.0, H<sub>2</sub>' and H<sub>6</sub>'), 7.18 (2 H, s, H<sub>2</sub>'' and H<sub>6</sub>''), 17.00 (1 H, s, OH).

**D<sub>2,3</sub>(14/12):** dark yellow viscous solid (42%). Mp 44 °C. Elemental analysis: Found: C, 78.6; H, 11.2%. C<sub>79</sub>H<sub>140</sub>O<sub>7</sub> requires C, 78.9; H, 11.7%.  $\nu_{\max}(\text{solid})/\text{cm}^{-1}$ : 3383w  $\nu(\text{O-H})$ , 2920vs, 2851vs  $\nu(\text{C-H})$ , 1697w  $\nu(\text{C=O})$ , 1592s  $\nu(\text{C=C})$ .  $\delta_{\text{H}}$  (300 MHz; CDCl<sub>3</sub>; Me<sub>4</sub>Si)/ppm: 0.88 (15 H, t, <sup>3</sup>J 6.6, CH<sub>3</sub>), 1.27-1.47 (98 H, m, CH<sub>2</sub>), 1.71-1.86 (10 H, m,

CH<sub>2</sub>), 3.99-4.08 (10 H, m, OCH<sub>2</sub>), 6.63 (1 H, t, <sup>4</sup>J 2.0, H4'), 6.69 (1 H, s, H2), 7.08 (2 H, d, <sup>4</sup>J 2.0, H2' and H6'), 7.18 (2 H, s, H2'' and H6''), 17.00 (1 H, s, OH).

**D<sub>2,3</sub>(14/16):** yellow solid (50%). Mp 57 °C. Elemental analysis: Found: C, 79.6; H, 11.5%. C<sub>91</sub>H<sub>164</sub>O<sub>7</sub> requires C, 79.8; H, 12.0%.  $\nu_{\max}(\text{solid})/\text{cm}^{-1}$ : 3376w  $\nu(\text{O-H})$ , 2920vs, 2851vs  $\nu(\text{C-H})$ , 1704w  $\nu(\text{C=O})$ , 1590s  $\nu(\text{C=C})$ .  $\delta_{\text{H}}$  (300 MHz; CDCl<sub>3</sub>; Me<sub>4</sub>Si)/ppm: 0.88 (15 H, t, <sup>3</sup>J 6.6, CH<sub>3</sub>), 1.26-1.47 (122 H, m, CH<sub>2</sub>), 1.69-1.89 (10 H, m, CH<sub>2</sub>), 3.98-4.08 (10 H, m, OCH<sub>2</sub>), 6.63 (1 H, t, <sup>4</sup>J 2.0, H4'), 6.69 (1 H, s, H2), 7.08 (2 H, d, <sup>4</sup>J 2.0, H2' and H6'), 7.18 (2 H, s, H2'' and H6''), 17.00 (1 H, s, OH).

**D<sub>2,3</sub>(14/18):** pale yellow solid (66%). Mp 50 °C. Elemental analysis: Found: C, 79.9; H, 11.6%. C<sub>97</sub>H<sub>176</sub>O<sub>7</sub> requires C, 80.1; H, 12.2%.  $\nu_{\max}(\text{solid})/\text{cm}^{-1}$ : 3369w  $\nu(\text{O-H})$ , 2919vs, 2851vs  $\nu(\text{C-H})$ , 1697w  $\nu(\text{C=O})$ , 1591s  $\nu(\text{C=C})$ .  $\delta_{\text{H}}$  (300 MHz; CDCl<sub>3</sub>; Me<sub>4</sub>Si)/ppm: 0.89 (15 H, t, <sup>3</sup>J 6.6, CH<sub>3</sub>), 1.26-1.47 (134 H, m, CH<sub>2</sub>), 1.74-1.87 (10 H, m, CH<sub>2</sub>), 3.99-4.08 (10 H, m, OCH<sub>2</sub>), 6.63 (1 H, t, <sup>4</sup>J 2.0, H4'), 6.69 (1 H, s, H2), 7.09 (2 H, d, <sup>4</sup>J 2.0, H2' and H6'), 7.19 (2 H, s, H2'' and H6''), 16.99 (1 H, s, OH).

**D<sub>2,3</sub>(16/12):** dark yellow viscous solid (35%). Mp 43 °C. Elemental analysis: Found: C, 79.5; H, 11.4%. C<sub>83</sub>H<sub>148</sub>O<sub>7</sub> requires C, 79.2; H, 11.8%.  $\nu_{\max}(\text{solid})/\text{cm}^{-1}$ : 3389w  $\nu(\text{O-H})$ , 2920vs, 2852vs  $\nu(\text{C-H})$ , 1697w  $\nu(\text{C=O})$ , 1594s  $\nu(\text{C=C})$ .  $\delta_{\text{H}}$  (300 MHz; CDCl<sub>3</sub>; Me<sub>4</sub>Si)/ppm: 0.89 (15 H, t, <sup>3</sup>J 6.6, CH<sub>3</sub>), 1.26-1.47 (106 H, m, CH<sub>2</sub>), 1.69-1.87 (10 H, m, CH<sub>2</sub>), 3.99-4.09 (10 H, m, OCH<sub>2</sub>), 6.63 (1 H, t, <sup>4</sup>J 2.0, H4'), 6.69 (1 H, s, H2), 7.09 (2 H, d, <sup>4</sup>J 2.0, H2' and H6'), 7.19 (2 H, s, H2'' and H6''), 16.99 (1 H, s, OH).

**D<sub>2,3</sub>(16/14):** yellow solid (48%). Mp 54 °C. Elemental analysis: Found: C, 79.8; H, 11.6%. C<sub>89</sub>H<sub>160</sub>O<sub>7</sub> requires C, 79.6; H, 12.0%.  $\nu_{\max}(\text{solid})/\text{cm}^{-1}$ : 3369w  $\nu(\text{O-H})$ , 2919vs, 2851vs  $\nu(\text{C-H})$ , 1690w  $\nu(\text{C=O})$ , 1596s  $\nu(\text{C=C})$ .  $\delta_{\text{H}}$  (300 MHz; CDCl<sub>3</sub>; Me<sub>4</sub>Si)/ppm: 0.89 (15 H, t, <sup>3</sup>J 6.6, CH<sub>3</sub>), 1.27-1.47 (138 H, m, CH<sub>2</sub>), 1.67-1.87 (10 H, m, CH<sub>2</sub>), 3.99-4.09 (10 H, m, OCH<sub>2</sub>), 6.63 (1 H, t, <sup>4</sup>J 2.0, H4'), 6.69 (1 H, s, H2), 7.09 (2 H, d, <sup>4</sup>J 2.0, H2' and H6'), 7.19 (2 H, s, H2'' and H6''), 16.99 (1 H, s, OH).

**D<sub>2,3</sub>(16/18):** pale yellow solid (70%). Mp 46 °C. Elemental analysis: Found: C, 79.8; H, 11.8%. C<sub>101</sub>H<sub>184</sub>O<sub>7</sub> requires C, 80.3; H, 12.2%.  $\nu_{\max}(\text{solid})/\text{cm}^{-1}$ : 3376w  $\nu(\text{O-H})$ , 2919vs, 2851vs  $\nu(\text{C-H})$ , 1704w  $\nu(\text{C=O})$ , 1599s  $\nu(\text{C=C})$ .  $\delta_{\text{H}}$  (300 MHz; CDCl<sub>3</sub>; Me<sub>4</sub>Si)/ppm: 0.88 (15 H, t, <sup>3</sup>J 6.6, CH<sub>3</sub>), 1.26-1.47 (142 H, m, CH<sub>2</sub>), 1.69-1.89 (10 H, m, CH<sub>2</sub>), 3.99-4.08

(10 H, m, OCH<sub>2</sub>), 6.63 (1 H, t, <sup>4</sup>J 2.0, H4'), 6.69 (1 H, s, H2), 7.08 (2 H, d, <sup>4</sup>J 2.0, H2' and H6'), 7.18 (2 H, s, H2'' and H6''), 16.99 (1 H, s, OH).

Table S1. Selected bond distances (Å) and angles (°) for difluoride 1-(4'-methoxyphenyl) propane-1,3-dionate boron [BF<sub>2</sub>]<sub>1,0</sub>(1)

|                      |          |                           |          |
|----------------------|----------|---------------------------|----------|
| B – F1               | 1.362(2) | F1 – B – F1' <sup>a</sup> | 109.6(2) |
| B – F1' <sup>a</sup> | 1.362(2) | F1 – B – O1               | 109.0(2) |
| B – O1               | 1.481(4) | F1 – B – O2               | 108.8(2) |
| B – O2               | 1.471(4) | F1' – B – O1 <sup>a</sup> | 109.0(2) |
| C1 – O1              | 1.301(3) | F1' – B – O2 <sup>a</sup> | 108.8(2) |
| C3 – O2              | 1.299(3) | O1 – B – O2               | 111.8(2) |
| C1 – C2              | 1.390(3) |                           |          |
| C2 – C3              | 1.337(3) |                           |          |

<sup>a</sup> Symmetry operation ('):  $x, -y + \frac{1}{2}, z$
